# Supplementary material for: tRF‐Leu‐CAG promotes cell proliferation and cell cycle in non‐small cell lung cancer
Source: PubMed Central journal article supplement — Chem Biol Drug Des. 2017 May 22;90(5):730–8. doi: 10.1111/cbdd.12994 (PMC5697697; doi:10.1111/cbdd.12994), 2017-05-22
Supplement: CBDD-90-730-s001.pdf [file CBDD-90-730-s001.pdf]

**Table. S1 Descriptive characteristics of samples**

| Characteristic     | Adenocarcinoma<br>(n=39) | Squamous Cell carcinoma<br>(n=21) |
|--------------------|--------------------------|-----------------------------------|
| Median age (range) | 61 (36-75)               | 64 (53-77)                        |
| Gender             |                          |                                   |
| Male               | 21 (53.8%)               | 17 (81.0%)                        |
| Female             | 18 (46.2%)               | 4 (19.0%)                         |
| Stage, n (%)       |                          |                                   |
| I A                | 10 (25.6%)               | 3 (14.3%)                         |
| I B                | 15 (38.4%)               | 3 (14.3%)                         |
| II A               | 3 (7.7%)                 | 5 (23.8%)                         |
| II B               | 1 (2.6%)                 | 2 (9.5%)                          |
| III A              | 6 (15.4%)                | 5 (23.8%)                         |
| III B              | 1 (2.6%)                 | 2 (9.5%)                          |
| IV                 | 3 (7.7%)                 | 1 (4.8%)                          |
