# Supplementary material for: tRF‐Leu‐CAG promotes cell proliferation and cell cycle in non‐small cell lung cancer
Source: PubMed Central journal article supplement — Chem Biol Drug Des. 2017 May 22;90(5):730–8. doi: 10.1111/cbdd.12994 (PMC5697697; doi:10.1111/cbdd.12994), 2017-05-22
Supplement: CBDD-90-730-s002.pdf [file CBDD-90-730-s002.pdf]

**Table. S2 qRT-PCR Primers**

| Primer Name | Primer Sequences                                            |
|-------------|-------------------------------------------------------------|
| U6          | Forward: CTCGCTTCGGCAGCACA<br>Reverse: AACGCTTCACGAATTTGCGT |
| tRF-Leu-CAG | Forward: GTCAGGATGGCCGAGCGGTCTAAGGCGC                       |
